# Supplementary material
Source: MDPI journal article supplement (https://www.mdpi.com/2077-0472/13/5/1045)
Supplement: s1 [file s1]

## White Stork (*Ciconia ciconia*) Nestlings Affected By Agricultural Practices? Assessment Of Integrated Biomarker Responses.

Dora Bjedov <sup>1</sup>, Mirna Velki <sup>2</sup>, Lucija Sara Kovačić <sup>2</sup>, Lidija Begović <sup>2</sup>, Ivan Lešić <sup>2</sup>, Luka Jurinović <sup>3</sup>, Tibor Mikuska <sup>4</sup>, Mirta Sudarić Bogojević <sup>2</sup>, Sandra Ečimović <sup>2</sup>, and Alma Mikuška <sup>2,\*</sup>

**Table S1.** Detailed results of pairwise *post-hoc* statistical analysis of the adopted models, performed with *emmeans* package in R (version 4.2.3.). Fixed effects are variables *biomarker response* and *sampling location*, while random effect is the variable *nest*. *P* value was adjusted by Tukey method. Significant comparisons are bolded.

|     |        |                           | estimate     | SE           | DF        | t.ratio       | <i>p</i> value |
|-----|--------|---------------------------|--------------|--------------|-----------|---------------|----------------|
| ChE | Plasma | Baranja - Jakuševac       | 3.20         | 2.54         | 49        | -1.258        | 0.4253         |
|     |        | Baranja - Srijem          | -4.66        | 2.00         | 49        | -2.332        | 0.0607         |
|     |        | <b>Jakuševac - Srijem</b> | <b>-7.86</b> | <b>2.63</b>  | <b>49</b> | <b>-2.985</b> | <b>0.0121</b>  |
| CES | Plasma | Baranja - Jakuševac       | 4.44         | 4.13         | 49        | 1.074         | 0.5345         |
|     |        | Baranja - Srijem          | 3.02         | 3.42         | 49        | 0.882         | 0.6539         |
|     |        | Jakuševac - Srijem        | -1.42        | 4.33         | 49        | -3.27         | 0.9427         |
|     | S9     | Baranja - Jakuševac       | 0.45         | 0.45         | 50        | 0.987         | 0.5881         |
|     |        | Baranja - Srijem          | -0.30        | 0.35         | 50        | -0.856        | 0.6702         |
|     |        | Jakuševac - Srijem        | -0.75        | 0.46         | 50        | -1.607        | 0.252          |
| GST | Plasma | Baranja - Jakuševac       | 0.51         | 0.88         | 48        | 0.577         | 0.8992         |
|     |        | Baranja - Srijem          | 1.02         | 0.74         | 48        | 1.38          | 0.3594         |
|     |        | Jakuševac - Srijem        | 0.51         | 0.93         | 48        | 0.553         | 0.8455         |
|     | S9     | Baranja - Jakuševac       | 0.93         | 1.51         | 49        | 0.618         | 0.8109         |
|     |        | Baranja - Srijem          | 0.24         | 1.24         | 49        | 0.193         | 0.9796         |
|     |        | Jakuševac - Srijem        | -0.69        | 1.56         | 49        | -0.446        | 0.8964         |
| GR  | Plasma | Baranja - Jakuševac       | 10.40        | 25.80        | 48        | 0.404         | 0.9141         |
|     |        | <b>Baranja - Srijem</b>   | <b>53.20</b> | <b>21.40</b> | <b>48</b> | <b>2.484</b>  | <b>0.0429</b>  |
|     |        | Jakuševac - Srijem        | 42.80        | 26.90        | 48        | 1.594         | 0.258          |
|     | S9     | Baranja - Jakuševac       | -77.10       | 99.80        | 50        | -0.773        | 0.7212         |
|     |        | Baranja - Srijem          | -182.10      | 80.60        | 50        | -2.26         | 0.071          |
|     |        | Jakuševac - Srijem        | -104.90      | 102.00       | 50        | -1.028        | 0.5627         |
| GSH | Plasma | Baranja - Jakuševac       | -189         | 296          | 48        | -0.638        | 0.8002         |
|     |        | Baranja - Srijem          | 399          | 246          | 48        | 1.62          | 0.247          |
|     |        | Jakuševac - Srijem        | 588          | 308          | 48        | 1.905         | 0.1482         |
|     | S9     | Baranja - Jakuševac       | 890          | 827          | 47        | 1.076         | 0.5336         |
|     |        | Baranja - Srijem          | 859          | 698          | 47        | 1.23          | 0.4419         |
|     |        | Jakuševac - Srijem        | -31          | 870          | 47        | -0.036        | 0.9993         |
| ROS | Plasma | Baranja - Jakuševac       | -6.66667     | 3.96         | 50        | -1.682        | 0.2221         |

|    |                     |          |      |    |        |        |
|----|---------------------|----------|------|----|--------|--------|
|    | Baranja - Srijem    | -6.65789 | 3.23 | 50 | -2.059 | 0.109  |
|    | Jakuševac - Srijem  | 0.00877  | 4.11 | 50 | 0.002  | 1.000  |
| S9 | Baranja - Jakuševac | -12.939  | 6.02 | 51 | -2.149 | 0.0901 |
|    | Baranja - Srijem    | 0.544    | 4.84 | 51 | 0.112  | 0.9931 |
|    | Jakuševac - Srijem  | 13.483   | 6.20 | 51 | 2.176  | 0.085  |

---

ChE – cholinesterase; CES – carboxylesterase; GST – glutathione S-transferase; GR – glutathione reductase; GSH – glutathione; ROS – reactive oxygen species; estimate – estimate of the size effect, i.e. the difference between the estimated marginal means; SE – standard error; DF – degrees of freedom; t.ratio – test statistic to generate the *p* value.

**Table S2.** Results of molecular sex determination in white stork (*Ciconia ciconia*) nestlings' blood and biomarker response in females and males for each sampling location – Jakuševac, Baranja and Srijem.

|                                                            |        | Jakuševac |           |          |           | Baranja  |           |          |           | Srijem  |           |       |           |
|------------------------------------------------------------|--------|-----------|-----------|----------|-----------|----------|-----------|----------|-----------|---------|-----------|-------|-----------|
|                                                            |        | Females   |           | Males    |           | Females  |           | Males    |           | Females |           | Males |           |
| <i>n</i>                                                   |        | 6         |           | 3        |           | 12       |           | 11       |           | 7       |           | 12    |           |
|                                                            |        | mean      | <i>SD</i> | mean     | <i>SD</i> | mean     | <i>SD</i> | mean     | <i>SD</i> | mean    | <i>SD</i> | mean  | <i>SD</i> |
| <b>ChE</b>                                                 | Plasma | 28.38     | 12.39     | 28.86    | 0.65      | 26.89    | 4.50      | 35.11    | 7.62      | 29      | 7.99      | 35    | 7.62      |
| (nmol min <sup>-1</sup> mg <sub>PROT</sub> <sup>-1</sup> ) | S9     | 4.79      | 1.42      | 4.68     | 2.02      | 4.38     | 1.35      | 4.55     | 2.25      | 4       | 1.15      | 5     | 2.25      |
| <b>CES</b>                                                 | Plasma | 33.27     | 21.38     | 33.42    | 7.97      | 36.87    | 8.85      | 39.66    | 12.67     | 33      | 8.25      | 40    | 12.67     |
| (nmol min <sup>-1</sup> mg <sub>PROT</sub> <sup>-1</sup> ) | S9     | 8.71      | 2.20      | 7.77     | 0.37      | 8.30     | 1.34      | 8.50     | 1.31      | 8       | 0.81      | 8     | 1.31      |
| <b>GST</b>                                                 | Plasma | 13.57     | 2.99      | 12.97    | 2.59      | 13.04    | 1.90      | 12.29    | 1.54      | 13      | 3.10      | 12    | 1.54      |
| (nmol min <sup>-1</sup> mg <sub>PROT</sub> <sup>-1</sup> ) | S9     | 13.49     | 3.40      | 14.41    | 4.05      | 14.64    | 4.37      | 13.63    | 5.44      | 14      | 4.46      | 14    | 5.44      |
| <b>GR</b>                                                  | Plasma | 252.30    | 80.06     | 293.42   | 102.37    | 319.87   | 118.95    | 233.74   | 56.73     | 230     | 99.76     | 234   | 56.73     |
| (pmol min <sup>-1</sup> mg <sub>PROT</sub> <sup>-1</sup> ) | S9     | 957.08    | 337.47    | 802.88   | 209.49    | 808.62   | 289.84    | 1000.93  | 230.87    | 989     | 195.53    | 1001  | 230.87    |
| <b>GSH</b>                                                 | Plasma | 4451.06   | 1114.80   | 3459.78  | 1220.64   | 4170.51  | 1299.04   | 3586.88  | 446.30    | 3388    | 779.64    | 3587  | 446.30    |
| (RFU)                                                      | S9     | 21028.33  | 2147.23   | 20814.83 | 2380.48   | 22254.23 | 1360.51   | 21189.09 | 2806.66   | 22040   | 1115.05   | 21189 | 2806.66   |
| <b>ROS</b>                                                 | Plasma | 120.89    | 10.69     | 109.89   | 20.38     | 112.49   | 9.54      | 120.03   | 7.49      | 118     | 9.20      | 120   | 7.49      |
| (RFU)                                                      | S9     | 47.17     | 10.80     | 57.22    | 27.69     | 39.38    | 15.78     | 39.75    | 17.18     | 33      | 17.11     | 40    | 17.18     |

ChE – cholinesterase; CES – carboxylesterase; GST – glutathione S-transferase; GR – glutathione reductase; GSH – glutathione; ROS – reactive oxygen species; RFU – relative fluorescence; *n* – number of nestlings, *SD* – standard deviation.

**Table S3.** Descriptive statistics of esterase activity and oxidative stress biomarkers from two blood fractions (plasma and S9) analysed in white stork (*Ciconia ciconia*) nestlings from landfill Jakuševac and agricultural areas Baranja and Srijem during breeding seasons 2020<sup>a</sup>, 2021<sup>b</sup> and 2022<sup>c</sup>.

|                                                                          |        |          | Jakuševac |         |         | Baranja |         |         | Srijem  |         |         |
|--------------------------------------------------------------------------|--------|----------|-----------|---------|---------|---------|---------|---------|---------|---------|---------|
|                                                                          |        |          | 2020      | 2021    | 2022    | 2020    | 2021    | 2022    | 2020    | 2021    | 2022    |
| <b>ChE</b><br>(nmol min <sup>-1</sup> mg <sub>PROT</sub> <sup>-1</sup> ) | Plasma | <i>n</i> | NA        | 8       | 10      | 18      | 17      | 24      | 25      | 29      | 19      |
|                                                                          |        | min.     | NA        | 20.39   | 16.22   | 7.45    | 17.03   | 19.61   | 11.87   | 15.62   | 21.20   |
|                                                                          |        | max.     | NA        | 30.57   | 51.51   | 31.10   | 61.98   | 37.56   | 36.87   | 47.55   | 47.47   |
|                                                                          |        | range    | NA        | 10.18   | 35.29   | 23.65   | 44.95   | 17.95   | 25.00   | 31.93   | 26.26   |
|                                                                          | S9     | <i>n</i> | NA        | 8       | 10      | 16      | 15      | 24      | 23      | 27      | 20      |
|                                                                          |        | min.     | NA        | 1.28    | 3.29    | 1.62    | 0.45    | 2.65    | 2.11    | 1.04    | 2.37    |
|                                                                          |        | max.     | NA        | 4.47    | 7.00    | 5.99    | 10.40   | 8.02    | 7.84    | 8.54    | 10.03   |
|                                                                          |        | range    | NA        | 3.18    | 3.70    | 4.37    | 9.94    | 5.36    | 5.73    | 7.51    | 7.66    |
| <b>CES</b><br>(nmol min <sup>-1</sup> mg <sub>PROT</sub> <sup>-1</sup> ) | Plasma | <i>n</i> | NA        | 8       | 10      | 18      | 17      | 24      | 25      | 30      | 19      |
|                                                                          |        | min.     | NA        | 20.47   | 10.22   | 8.04    | 17.22   | 17.78   | 10.67   | 22.14   | 19.69   |
|                                                                          |        | max.     | NA        | 79.10   | 62.77   | 48.22   | 40.46   | 53.44   | 55.44   | 68.77   | 67.80   |
|                                                                          |        | range    | NA        | 58.63   | 52.55   | 40.18   | 23.24   | 35.66   | 44.77   | 46.63   | 48.11   |
|                                                                          | S9     | <i>n</i> | NA        | 7       | 10      | 17      | 11      | 24      | 25      | 24      | 20      |
|                                                                          |        | min.     | NA        | 2.06    | 6.67    | 2.53    | 4.42    | 6.38    | 2.75    | 1.00    | 6.64    |
|                                                                          |        | max.     | NA        | 6.31    | 12.84   | 17.72   | 9.10    | 10.65   | 16.03   | 9.24    | 11.42   |
|                                                                          |        | range    | NA        | 4.25    | 6.18    | 15.19   | 4.68    | 4.28    | 13.28   | 8.24    | 4.78    |
| <b>GST</b><br>(nmol min <sup>-1</sup> mg <sub>PROT</sub> <sup>-1</sup> ) | Plasma | <i>n</i> | NA        | 7       | 10      | 18      | 16      | 24      | 25      | 30      | 17      |
|                                                                          |        | min.     | NA        | 6.36    | 9.87    | 8.59    | 4.42    | 9.39    | 10.24   | 3.97    | 9.30    |
|                                                                          |        | max.     | NA        | 8.98    | 17.22   | 49.60   | 10.18   | 18.77   | 52.54   | 12.17   | 17.49   |
|                                                                          |        | range    | NA        | 2.63    | 7.35    | 41.01   | 5.76    | 9.38    | 42.30   | 8.20    | 8.19    |
|                                                                          | S9     | <i>n</i> | NA        | 8       | 10      | 16      | 16      | 24      | 23      | 27      | 19      |
|                                                                          |        | min.     | NA        | 18.98   | 8.30    | 8.54    | 4.64    | 8.60    | 8.93    | 14.44   | 7.06    |
|                                                                          |        | max.     | NA        | 54.42   | 17.90   | 19.57   | 78.17   | 25.22   | 26.23   | 109.40  | 25.52   |
|                                                                          |        | range    | NA        | 35.44   | 9.61    | 11.03   | 73.53   | 16.62   | 17.30   | 94.93   | 18.46   |
| <b>GR</b><br>(pmol min <sup>-1</sup> mg <sub>PROT</sub> <sup>-1</sup> )  | Plasma | <i>n</i> | NA        | 8       | 10      | 16      | 12      | 24      | 24      | 24      | 19      |
|                                                                          |        | min.     | NA        | 91.13   | 141.50  | 167.60  | 25.58   | 158.30  | 107.10  | 63.75   | 144.50  |
|                                                                          |        | max.     | NA        | 267.70  | 364.70  | 972.20  | 407.70  | 605.80  | 573.00  | 605.70  | 431.60  |
|                                                                          |        | range    | NA        | 176.60  | 223.20  | 804.60  | 382.10  | 447.50  | 466.00  | 542.00  | 287.10  |
|                                                                          | S9     | <i>n</i> | NA        | 8       | 10      | 16      | 15      | 23      | 24      | 27      | 20      |
|                                                                          |        | min.     | NA        | 275.20  | 535.40  | 558.30  | 113.00  | 479.50  | 371.30  | 472.60  | 556.40  |
|                                                                          |        | max.     | NA        | 1711.00 | 1534.00 | 1439.00 | 4886.00 | 1543.00 | 3671.00 | 3105.00 | 1623.00 |
|                                                                          |        | range    | NA        | 1436.00 | 998.20  | 881.00  | 4773.00 | 1064.00 | 3300.00 | 2633.00 | 1067.00 |
| <b>GSH</b><br>(RFU)                                                      | Plasma | <i>n</i> | NA        | 8       | 10      | 17      | 17      | 24      | 24      | 29      | 18      |
|                                                                          |        | min.     | NA        | 4535    | 2062    | 4722    | 2138    | 2940    | 7557    | 2685    | 2012    |
|                                                                          |        | max.     | NA        | 8741    | 6306    | 11030   | 7626    | 7426    | 16397   | 7803    | 4571    |
|                                                                          |        | range    | NA        | 4206    | 4244    | 6308    | 5487    | 4486    | 8840    | 5118    | 2558    |
|                                                                          | S9     | <i>n</i> | NA        | 8       | 10      | 17      | 17      | 23      | 25      | 30      | 17      |
|                                                                          |        | min.     | NA        | 12834   | 17294   | 7755    | 1606    | 17990   | 11100   | 1254    | 15363   |
|                                                                          |        | max.     | NA        | 22434   | 23564   | 39418   | 27547   | 25407   | 40886   | 28833   | 24685   |
|                                                                          |        | range    | NA        | 9600    | 6270    | 31662   | 25941   | 7418    | 29787   | 27579   | 9323    |

|                     |        |          |    |        |        |       |        |        |        |        |        |
|---------------------|--------|----------|----|--------|--------|-------|--------|--------|--------|--------|--------|
| <b>ROS</b><br>(RFU) | Plasma | <i>n</i> | NA | 14     | 10     | 17    | 23     | 24     | 23     | 36     | 19     |
|                     |        | min.     | NA | 84.22  | 90.33  | 64.67 | 79.89  | 92.33  | 84.33  | 80.56  | 97.67  |
|                     |        | max.     | NA | 125.60 | 137.30 | 83.67 | 176.20 | 137.70 | 108.00 | 170.90 | 133.00 |
|                     |        | range    | NA | 41.34  | 47.00  | 19.00 | 96.33  | 45.33  | 23.67  | 90.33  | 35.33  |
|                     | S9     | <i>n</i> | NA | 8      | 10     | 18    | 16     | 24     | 25     | 30     | 20     |
|                     |        | min.     | NA | 25.00  | 26.67  | 15.58 | 17.33  | 21.33  | 19.25  | 15.67  | 21.33  |
|                     |        | max.     | NA | 72.67  | 80.67  | 63.58 | 91.33  | 72.00  | 58.92  | 113.30 | 71.67  |
|                     |        | range    | NA | 47.67  | 54.00  | 48.00 | 74.00  | 50.67  | 39.67  | 97.67  | 50.33  |

NA – not analysed; ChE – cholinesterase; CES – carboxylesterase; GST – glutathione S-transferase; GR – glutathione reductase; GSH – glutathione; ROS – reactive oxygen species; RFU – relative fluorescence; *n* – number of sampled nestlings, min. – minimum value; max. – maximum value; <sup>a</sup> reference #22; <sup>b</sup> reference #23; <sup>c</sup> the present study.
